# Supplementary material for: Evaluation of Anthocyanin Profiles in Various Blackcurrant Cultivars over a Three-Year Period Using a Fast HPLC-DAD Method
Source: MDPI journal article supplement (doi:10.3390/foods10081745), 2021-07-29
Supplement: s1 [file s1]

# Evaluation of anthocyanin profiles in various blackcurrant cultivars over a three-years period using fast HPLC-DAD method

Barbora Šimerdová <sup>1</sup>, Michaela Bobříková <sup>1</sup>, Ivona Lhotská <sup>1</sup>, Jiří Kaplan <sup>2</sup>, Alena Křenová <sup>2</sup>, Dalibor Šatínský <sup>1\*</sup>

<sup>1</sup> The Department of Analytical Chemistry, Faculty of Pharmacy in Hradec Králové, Charles University, Czech Republic

<sup>2</sup> The Research and Breeding Institute of Pomology Holovousy, Holovousy 129, Hořice 508 01, Czech Republic

\* Corresponding author: satinsky@faf.cuni.cz, tel. +420495067228

## Supplementary material

### 1. HPLC analysis of blackcurrant cultivars

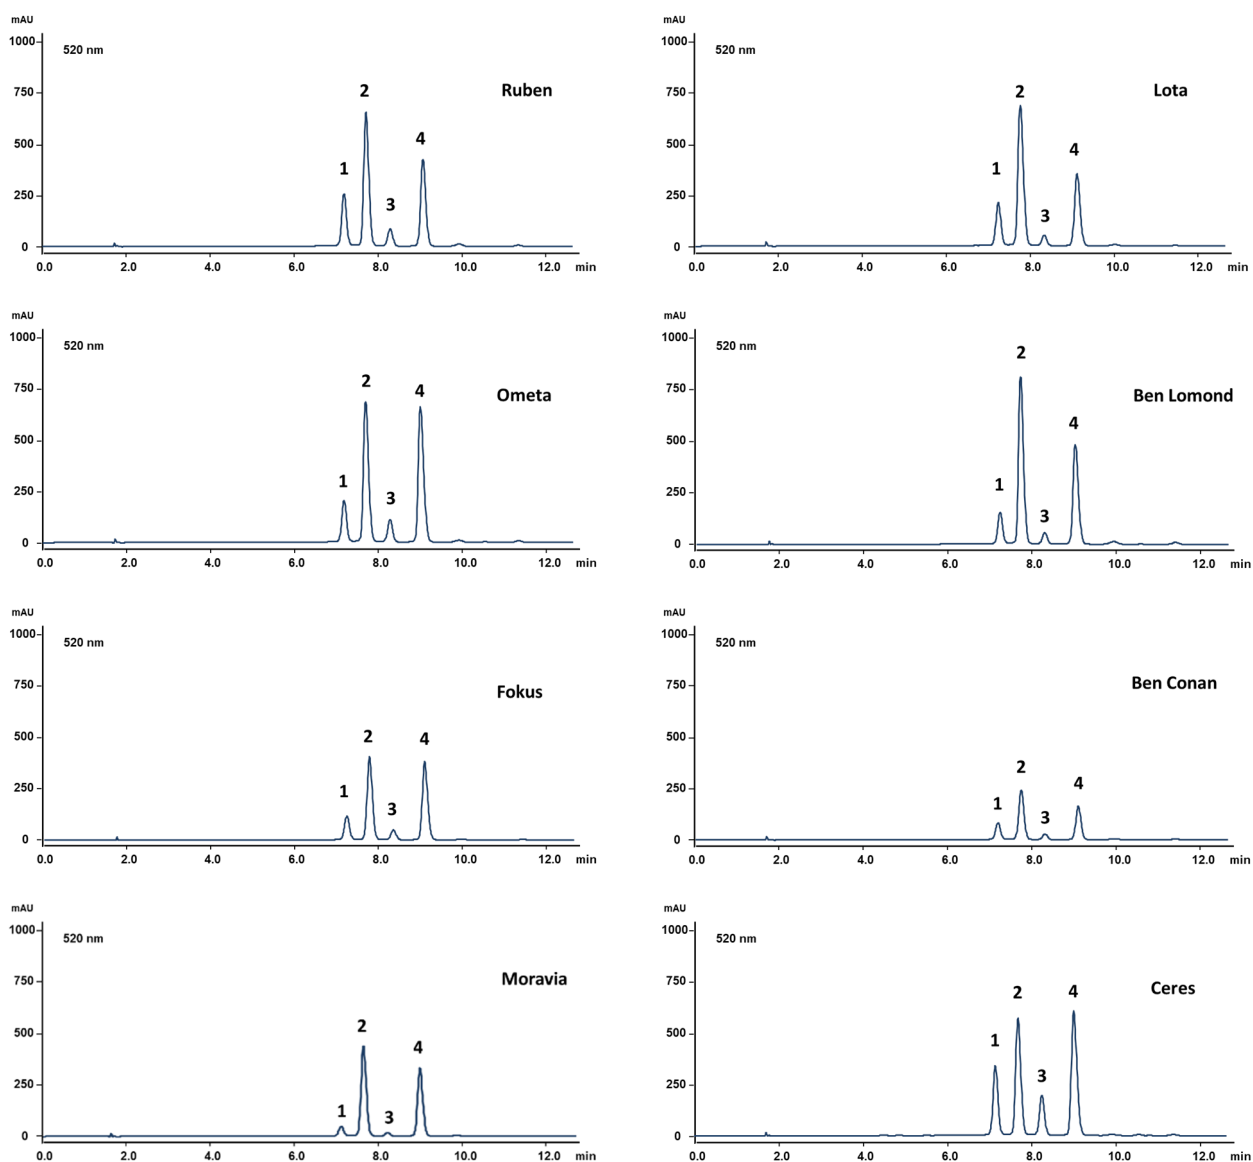

Figure S1: Chromatograms of anthocyanins content in several cultivars. (1) delphinidin-3-glucoside; (2) delphinidin-3-rutinoside; (3) cyanidin-3-glucoside; (4) cyanidin-3-rutinoside

## 2. Evaluation of anthocyanin content throughout the three-year experiment

Table S1: Total anthocyanin content in 15 blackcurrant cultivars in three years period

| Blackcurrant cultivars | Total anthocyanin content (mg/100 g) <sup>a</sup> |             |            |              |
|------------------------|---------------------------------------------------|-------------|------------|--------------|
|                        | First year                                        | Second year | Third year | Average      |
| Moravia                | 135.78                                            | 135.89      | 213.00     | 161.6 ± 44.6 |
| Ometa                  | 310.98                                            | 267.40      | 228.91     | 269.1 ± 41.1 |
| Ben Conan              | 79.41                                             | 186.60      | 198.21     | 154.7 ± 65.5 |
| Fokus                  | 141.42                                            | 187.83      | 209.04     | 179.4 ± 34.6 |
| Ceres                  | 261.82                                            | 234.54      | 347.56     | 281.3 ± 59.0 |
| Ben Lomond             | 217.38                                            | 130.95      | 282.66     | 210.3 ± 76.1 |
| Lota                   | 219.95                                            | 141.68      | 239.49     | 200.4 ± 51.8 |
| Ruben                  | 208.30                                            | 263.16      | 289.33     | 253.6 ± 41.4 |
| Ben Hope               | n.m.                                              | 211.20      | 301.89     | 256.6 ± 64.1 |
| Ben Gairn              | n.m.                                              | 235.17      | 353.59     | 294.4 ± 83.7 |
| Consort                | 172.56                                            | n.m.        | n.m.       | 172.6        |
| Tenah                  | 202.02                                            | n.m.        | n.m.       | 202.0        |
| Sejanec                | 186.27                                            | n.m.        | n.m.       | 186.3        |
| Triton                 | n.m.                                              | 174.91      | n.m.       | 174.9        |
| Josta                  | n.m.                                              | n.m.        | 93.48      | 93.5         |

<sup>a</sup> Calculated as a sum of four main individual anthocyanins

n.m. - not measured
